# Supplementary material for: Does vitamin D have a potential role in precocious puberty? A meta-analysis
Source: Royal Society of Chemistry journal article supplement (doi:10.1039/d3fo00665d), 2023-01-01
Supplement: d3fo00665d3.pdf [file d3fo00665d3.pdf]

Table S1 Search strategy (PubMed)

|           |                                                                                                                                                                                                                                                                                                                                                                                                                                                                                                                                                                                                                                                                                                                                                                                                                                                                                                                                                                                                                                                                                                                                                                                                                                                                                                                                                                                                                                                                                                                                                                                                                                                                                                                                                                                                                                                                                                                                                                                                                                                                                                                                                                                                                                                                                                                                                                                                                                                                                                                                                                                                                                                                                                                                                                                  |
|-----------|----------------------------------------------------------------------------------------------------------------------------------------------------------------------------------------------------------------------------------------------------------------------------------------------------------------------------------------------------------------------------------------------------------------------------------------------------------------------------------------------------------------------------------------------------------------------------------------------------------------------------------------------------------------------------------------------------------------------------------------------------------------------------------------------------------------------------------------------------------------------------------------------------------------------------------------------------------------------------------------------------------------------------------------------------------------------------------------------------------------------------------------------------------------------------------------------------------------------------------------------------------------------------------------------------------------------------------------------------------------------------------------------------------------------------------------------------------------------------------------------------------------------------------------------------------------------------------------------------------------------------------------------------------------------------------------------------------------------------------------------------------------------------------------------------------------------------------------------------------------------------------------------------------------------------------------------------------------------------------------------------------------------------------------------------------------------------------------------------------------------------------------------------------------------------------------------------------------------------------------------------------------------------------------------------------------------------------------------------------------------------------------------------------------------------------------------------------------------------------------------------------------------------------------------------------------------------------------------------------------------------------------------------------------------------------------------------------------------------------------------------------------------------------|
| Vitamin D | ("Vitamin D"[All Fields] OR "VD"[All Fields] OR "Vit D"[All Fields] OR ("Vitamin D"[MeSH Terms] OR "Vitamin D"[All Fields] OR "ergocalciferols"[MeSH Terms] OR "ergocalciferols"[All Fields]) AND ("metabolite"[All Fields] OR "metabolite s"[All Fields] OR "metabolites"[All Fields])) OR ("Vitamin D"[MeSH Terms] OR "Vitamin D"[All Fields] OR "ergocalciferols"[MeSH Terms] OR "ergocalciferols"[All Fields]) AND ("analog"[All Fields] OR "analoge"[All Fields] OR "analoges"[All Fields] OR "analogic"[All Fields] OR "analogical"[All Fields] OR "analogizing"[All Fields] OR "analogous"[All Fields] OR "analogously"[All Fields] OR "analogs"[All Fields] OR "analogue"[All Fields] OR "analogues"[All Fields])) OR "25-hydroxyvitamin D"[All Fields] OR "25OHD"[All Fields] OR "25-OH Vitamin D"[All Fields] OR ("25-Hydroxy"[All Fields] AND ("Vitamin D"[MeSH Terms] OR "Vitamin D"[All Fields] OR "ergocalciferols"[MeSH Terms] OR "ergocalciferols"[All Fields])) OR "25-hydroxy-vitamin D"[All Fields] OR "25-hydroxycholecalciferol"[All Fields] OR ("25-hydroxvitamin"[All Fields] AND "D"[All Fields]) OR ("1"[All Fields] AND "25oh2d"[All Fields]) OR "Vitamin D2"[All Fields] OR "25-OH-Vitamin-D2"[All Fields] OR "25OHD2"[All Fields] OR "25-hydroxy vitamin D2"[All Fields] OR ("ergocalciferols"[MeSH Terms] OR "ergocalciferols"[All Fields] OR "ergocalciferol"[All Fields]) OR ("ergocalciferols"[MeSH Terms] OR "ergocalciferols"[All Fields] OR "ergocalciferol"[All Fields]) OR ("ergocalciferols"[MeSH Terms] OR "ergocalciferols"[All Fields] OR "calciferol"[All Fields] OR "calciferols"[All Fields]) OR ("25-hydroxyvitamin D"[Supplementary Concept] OR "25-hydroxyvitamin D"[All Fields] OR "25 hydroxyergocalciferol"[All Fields] OR "25 hydroxyvitamin d 2"[MeSH Terms] OR "25 hydroxyvitamin d 2"[All Fields]) OR "25-Hydroxyvitamin D2"[All Fields] OR ("25 hydroxyvitamin d 2"[MeSH Terms] OR "25 hydroxyvitamin d 2"[All Fields] OR "25 hydroxycalciferol"[All Fields]) OR ("dihydrotachysterol"[MeSH Terms] OR "dihydrotachysterol"[All Fields]) OR ("dihydrotachysterol"[MeSH Terms] OR "dihydrotachysterol"[All Fields] OR "dihydrotachysterin"[All Fields]) OR "Vitamin D3"[All Fields] OR ("cholecalciferol"[MeSH Terms] OR "cholecalciferol"[All Fields] OR "cholecalciferols"[All Fields] OR "colecalciferol"[All Fields]) OR "25-hydroxyvitamin D3"[All Fields] OR "1,25-Dihydroxyvitamin D3"[All Fields] OR ("calcifediol"[MeSH Terms] OR "calcifediol"[All Fields] OR "calciol"[All Fields]) OR ("calcitriol"[MeSH Terms] OR "calcitriol"[All Fields] OR "calcitriols"[All Fields]) OR "1,25OH2D3"[All Fields] OR "1,25-dihydroxycholecalciferol"[All Fields] OR ("calcifediol"[MeSH Terms] OR "calcifediol"[All Fields]) |
|-----------|----------------------------------------------------------------------------------------------------------------------------------------------------------------------------------------------------------------------------------------------------------------------------------------------------------------------------------------------------------------------------------------------------------------------------------------------------------------------------------------------------------------------------------------------------------------------------------------------------------------------------------------------------------------------------------------------------------------------------------------------------------------------------------------------------------------------------------------------------------------------------------------------------------------------------------------------------------------------------------------------------------------------------------------------------------------------------------------------------------------------------------------------------------------------------------------------------------------------------------------------------------------------------------------------------------------------------------------------------------------------------------------------------------------------------------------------------------------------------------------------------------------------------------------------------------------------------------------------------------------------------------------------------------------------------------------------------------------------------------------------------------------------------------------------------------------------------------------------------------------------------------------------------------------------------------------------------------------------------------------------------------------------------------------------------------------------------------------------------------------------------------------------------------------------------------------------------------------------------------------------------------------------------------------------------------------------------------------------------------------------------------------------------------------------------------------------------------------------------------------------------------------------------------------------------------------------------------------------------------------------------------------------------------------------------------------------------------------------------------------------------------------------------------|

|                    |                                                                                                                                                                                                                                                                                                                                                                                                                                                                                                                                                                                                                                                                                                                                                                                                                                                                                                                                                                                                                                                                                                                                                                                                                                                                                                                                                                                                                                                                                                                                                                                                                                                                                                                                                                                                                                                                                                                                                                                                                                                                                                                                                                                                                                                                                                                                            |
|--------------------|--------------------------------------------------------------------------------------------------------------------------------------------------------------------------------------------------------------------------------------------------------------------------------------------------------------------------------------------------------------------------------------------------------------------------------------------------------------------------------------------------------------------------------------------------------------------------------------------------------------------------------------------------------------------------------------------------------------------------------------------------------------------------------------------------------------------------------------------------------------------------------------------------------------------------------------------------------------------------------------------------------------------------------------------------------------------------------------------------------------------------------------------------------------------------------------------------------------------------------------------------------------------------------------------------------------------------------------------------------------------------------------------------------------------------------------------------------------------------------------------------------------------------------------------------------------------------------------------------------------------------------------------------------------------------------------------------------------------------------------------------------------------------------------------------------------------------------------------------------------------------------------------------------------------------------------------------------------------------------------------------------------------------------------------------------------------------------------------------------------------------------------------------------------------------------------------------------------------------------------------------------------------------------------------------------------------------------------------|
|                    | OR "25-OH-Vitamin-D3"[All Fields] OR "25OHD3"[All Fields] OR "25-OH-Vitamin-D3"[All Fields] OR "25-hydroxy vitamin D3"[All Fields] OR ("hydroxycholecalciferols"[MeSH Terms] OR "hydroxycholecalciferols"[All Fields] OR "hydroxycholecalciferol"[All Fields]) OR ("hydroxycholecalciferols"[MeSH Terms] OR "hydroxycholecalciferols"[All Fields] OR "hydroxycholecalciferol"[All Fields]))                                                                                                                                                                                                                                                                                                                                                                                                                                                                                                                                                                                                                                                                                                                                                                                                                                                                                                                                                                                                                                                                                                                                                                                                                                                                                                                                                                                                                                                                                                                                                                                                                                                                                                                                                                                                                                                                                                                                                |
| Precocious puberty | ("puberty, precocious"[MeSH Terms] OR ("puberty"[All Fields] AND "precocious"[All Fields]) OR "precocious puberty"[All Fields] OR ("precocious"[All Fields] AND "puberties"[All Fields]) OR "precocious puberties"[All Fields] OR ("physiopathology"[MeSH Subheading] OR "physiopathology"[All Fields] OR "pp"[All Fields]) OR ("puberty, precocious"[MeSH Terms] OR ("puberty"[All Fields] AND "precocious"[All Fields]) OR "precocious puberty"[All Fields] OR ("pubertas"[All Fields] AND "praecox"[All Fields]) OR "pubertas praecox"[All Fields] OR "Central Precocious Puberty"[All Fields] OR ("6 chloro 2 1 piperazinyl pyrazine"[Supplementary Concept] OR "6 chloro 2 1 piperazinyl pyrazine"[All Fields] OR "cpp"[All Fields]) OR ("poverty public policy"[Journal] OR "philos psychiatr psychol"[Journal] OR "ppp"[All Fields]) OR ("puberty, precocious"[MeSH Terms] OR ("puberty"[All Fields] AND "precocious"[All Fields]) OR "precocious puberty"[All Fields] OR ("sexual"[All Fields] AND "precocities"[All Fields]) OR "sexual precocities"[All Fields]) OR ("puberty, precocious"[MeSH Terms] OR ("puberty"[All Fields] AND "precocious"[All Fields]) OR "precocious puberty"[All Fields] OR ("idiopathic"[All Fields] AND "sexual"[All Fields] AND "precocity"[All Fields]) OR "idiopathic sexual precocity"[All Fields] OR "Familial Precocious Puberty"[All Fields] OR ("puberty, precocious"[MeSH Terms] OR ("puberty"[All Fields] AND "precocious"[All Fields]) OR "precocious puberty"[All Fields] OR ("male"[All Fields] AND "limited"[All Fields] AND "precocious"[All Fields] AND "puberties"[All Fields])) OR ("puberty, precocious"[MeSH Terms] OR ("puberty"[All Fields] AND "precocious"[All Fields]) OR "precocious puberty"[All Fields] OR "testotoxicosis"[All Fields]) OR "ICPP"[All Fields] OR (("precocious"[All Fields] OR "precociously"[All Fields]) AND ("sexual maturation"[MeSH Terms] OR ("sexual"[All Fields] AND "maturation"[All Fields]) OR "sexual maturation"[All Fields])) OR ("pseudo-precocious"[All Fields] AND ("puberty"[MeSH Terms] OR "puberty"[All Fields] OR "puberties"[All Fields])) OR (("peripheral"[All Fields] OR "peripherally"[All Fields] OR "peripherals"[All Fields] OR "periphereal"[All Fields] OR "peripheric"[All Fields] OR "peripherically"[All Fields]) AND |

("puberty, precocious"[MeSH Terms] OR ("puberty"[All Fields] AND "precocious"[All Fields]) OR "precocious puberty"[All Fields] OR ("precocious"[All Fields] AND "puberty"[All Fields])) OR ("puberty"[MeSH Terms] OR "puberty"[All Fields] OR "puberties"[All Fields]) OR ("pubertal"[All Fields] OR "pubertally"[All Fields] OR "pubertals"[All Fields]) OR ("puberty, precocious"[MeSH Terms] OR ("puberty"[All Fields] AND "precocious"[All Fields]) OR "precocious puberty"[All Fields] OR ("precocious"[All Fields] AND "puberty"[All Fields])) OR (("partial"[All Fields] OR "partials"[All Fields]) AND ("puberty, precocious"[MeSH Terms] OR ("puberty"[All Fields] AND "precocious"[All Fields]) OR "precocious puberty"[All Fields] OR ("precocious"[All Fields] AND "puberty"[All Fields])) OR ("premature birth"[MeSH Terms] OR ("premature"[All Fields] AND "birth"[All Fields]) OR "premature birth"[All Fields] OR "premature"[All Fields] OR "prematurely"[All Fields] OR "prematures"[All Fields] OR "prematurities"[All Fields] OR "prematernity"[All Fields]) AND ("adrenarchal"[All Fields] OR "adrenarche"[MeSH Terms] OR "adrenarche"[All Fields] OR "adrenarcheal"[All Fields])) OR "hypothalamic pituitary gonadal axis"[All Fields] OR "early female puberty"[All Fields] OR ("menarch"[All Fields] OR "menarchal"[All Fields] OR "menarche"[MeSH Terms] OR "menarche"[All Fields] OR "menarcheal"[All Fields] OR "menarches"[All Fields]) OR ("agrosyst geosci environ"[Journal] OR "age"[Journal] OR "age omaha"[Journal] OR "age dordr"[Journal] OR "adv genet eng"[Journal] OR "age"[All Fields]) AND ("menarch"[All Fields] OR "menarchal"[All Fields] OR "menarche"[MeSH Terms] OR "menarche"[All Fields] OR "menarcheal"[All Fields] OR "menarches"[All Fields])) OR (("timely"[All Fields] OR "timing"[All Fields] OR "timings"[All Fields]) AND ("menarch"[All Fields] OR "menarchal"[All Fields] OR "menarche"[MeSH Terms] OR "menarche"[All Fields] OR "menarcheal"[All Fields] OR "menarches"[All Fields]))))
