# Supplementary material for: Does vitamin D have a potential role in precocious puberty? A meta-analysis
Source: Royal Society of Chemistry journal article supplement (doi:10.1039/d3fo00665d), 2023-01-01
Supplement: d3fo00665d4.pdf [file d3fo00665d4.pdf]

Table S2. The Summary of Findings (SoF) with GRADE system (vitamin D levels and risk of precocious puberty)

| The association between vitamin D and precocious puberty                                                                                                                                                                                                                                                                                                                                                                                                                                                                                                                                                                                                                                                                                                                                                                                                                                                                                                                                                                                                                                                                                                                                                                                                                                 |                                             |                               |                                          |
|------------------------------------------------------------------------------------------------------------------------------------------------------------------------------------------------------------------------------------------------------------------------------------------------------------------------------------------------------------------------------------------------------------------------------------------------------------------------------------------------------------------------------------------------------------------------------------------------------------------------------------------------------------------------------------------------------------------------------------------------------------------------------------------------------------------------------------------------------------------------------------------------------------------------------------------------------------------------------------------------------------------------------------------------------------------------------------------------------------------------------------------------------------------------------------------------------------------------------------------------------------------------------------------|---------------------------------------------|-------------------------------|------------------------------------------|
| Population: Subjects with precocious puberty vs. normal subjects.                                                                                                                                                                                                                                                                                                                                                                                                                                                                                                                                                                                                                                                                                                                                                                                                                                                                                                                                                                                                                                                                                                                                                                                                                        |                                             |                               |                                          |
| Settings: Twenty-nine studies were conducted in China, seven studies were conducted in other countries.                                                                                                                                                                                                                                                                                                                                                                                                                                                                                                                                                                                                                                                                                                                                                                                                                                                                                                                                                                                                                                                                                                                                                                                  |                                             |                               |                                          |
| Outcomes                                                                                                                                                                                                                                                                                                                                                                                                                                                                                                                                                                                                                                                                                                                                                                                                                                                                                                                                                                                                                                                                                                                                                                                                                                                                                 | SMD <sup>a</sup> / OR <sup>b</sup> (95% CI) | No. of participants (studies) | Quality of the evidence Comments (GRADE) |
| Vitamin D levels (ng/ml)                                                                                                                                                                                                                                                                                                                                                                                                                                                                                                                                                                                                                                                                                                                                                                                                                                                                                                                                                                                                                                                                                                                                                                                                                                                                 | -1.16(-1.41, -0.91)                         | 9884(35 studies)              | ⊕⊕⊕⊖ MODERATE <sup>c</sup>               |
| Risk of precocious puberty                                                                                                                                                                                                                                                                                                                                                                                                                                                                                                                                                                                                                                                                                                                                                                                                                                                                                                                                                                                                                                                                                                                                                                                                                                                               | 2.25(1.66, 3.04)                            | 5623(14 studies)              | ⊕⊕⊕⊖ MODERATE <sup>c</sup>               |
| <p>GRADE working group grades of evidence.</p> <p>High quality: We are very confident that the true effect lies close to that of the estimate of the effect.</p> <p>Moderate quality: We are moderately confident in the effect estimate: The true effect is likely to be close to the estimate of the effect, but there is a possibility that it is substantially different.</p> <p>Low quality: Our confidence in the effect estimate is limited: The true effect may be substantially different from the estimate of the effect.</p> <p>Very low quality: We have very little confidence in the effect estimate: The true effect is likely to be substantially different from the estimate of effect.</p> <p>Abbreviations: SMD, standard mean deviation; OR, odds ratio; CI, confidence interval.</p> <p><sup>a</sup> Results for vitamin D levels of subjects with precocious puberty compared with controls.</p> <p><sup>b</sup> Results for risk of precocious puberty due to vitamin D insufficiency/deficiency.</p> <p><sup>c</sup> Upgraded by one level due to all the results of the included studies were almost identical (subjects with precocious puberty had lower vitamin D levels, and vitamin D insufficiency/deficiency had higher risk of precocious puberty).</p> |                                             |                               |                                          |
