# Supplementary material for: Does vitamin D have a potential role in precocious puberty? A meta-analysis
Source: Royal Society of Chemistry journal article supplement (doi:10.1039/d3fo00665d), 2023-01-01
Supplement: d3fo00665d5.pdf [file d3fo00665d5.pdf]

Table S3. The Summary of Findings (SoF) with GRADE system (vitamin D supplementation for patients with precocious puberty)

| Vitamin D supplementation for patients with precocious puberty                                                                                                                                                                                                                                                                                                                                                                                                                                                                                                                                                                                                                                                                                                                                                                                                                                                                                                                                                                                                                                                                                                                                                                                                       |                           |                               |                                          |
|----------------------------------------------------------------------------------------------------------------------------------------------------------------------------------------------------------------------------------------------------------------------------------------------------------------------------------------------------------------------------------------------------------------------------------------------------------------------------------------------------------------------------------------------------------------------------------------------------------------------------------------------------------------------------------------------------------------------------------------------------------------------------------------------------------------------------------------------------------------------------------------------------------------------------------------------------------------------------------------------------------------------------------------------------------------------------------------------------------------------------------------------------------------------------------------------------------------------------------------------------------------------|---------------------------|-------------------------------|------------------------------------------|
| Population: Subjects with precocious puberty                                                                                                                                                                                                                                                                                                                                                                                                                                                                                                                                                                                                                                                                                                                                                                                                                                                                                                                                                                                                                                                                                                                                                                                                                         |                           |                               |                                          |
| Settings: All studies were conducted in China.                                                                                                                                                                                                                                                                                                                                                                                                                                                                                                                                                                                                                                                                                                                                                                                                                                                                                                                                                                                                                                                                                                                                                                                                                       |                           |                               |                                          |
| Intervention: GnRHa + vitamin D                                                                                                                                                                                                                                                                                                                                                                                                                                                                                                                                                                                                                                                                                                                                                                                                                                                                                                                                                                                                                                                                                                                                                                                                                                      |                           |                               |                                          |
| Comparison: GnRHa                                                                                                                                                                                                                                                                                                                                                                                                                                                                                                                                                                                                                                                                                                                                                                                                                                                                                                                                                                                                                                                                                                                                                                                                                                                    |                           |                               |                                          |
| Outcomes                                                                                                                                                                                                                                                                                                                                                                                                                                                                                                                                                                                                                                                                                                                                                                                                                                                                                                                                                                                                                                                                                                                                                                                                                                                             | SMD (95% CI) <sup>a</sup> | No. of participants (studies) | Quality of the evidence Comments (GRADE) |
| LH(mIU/ml)                                                                                                                                                                                                                                                                                                                                                                                                                                                                                                                                                                                                                                                                                                                                                                                                                                                                                                                                                                                                                                                                                                                                                                                                                                                           | -3.55(-5.11, -1.99)       | 512 (7 studies)               | ⊕⊕⊕⊖ MODERATE <sup>b</sup>               |
| FSH(mIU/ml)                                                                                                                                                                                                                                                                                                                                                                                                                                                                                                                                                                                                                                                                                                                                                                                                                                                                                                                                                                                                                                                                                                                                                                                                                                                          | -4.35(-5.79, -2.92)       | 580 (8 studies)               | ⊕⊕⊕⊖ MODERATE <sup>b</sup>               |
| Estradiol(pg/ml)                                                                                                                                                                                                                                                                                                                                                                                                                                                                                                                                                                                                                                                                                                                                                                                                                                                                                                                                                                                                                                                                                                                                                                                                                                                     | -1.21(-1.71, -0.71)       | 580 (8 studies)               | ⊕⊕⊕⊖ MODERATE <sup>b</sup>               |
| Bone age(year)                                                                                                                                                                                                                                                                                                                                                                                                                                                                                                                                                                                                                                                                                                                                                                                                                                                                                                                                                                                                                                                                                                                                                                                                                                                       | -3.21(-4.86, -1.56)       | 358 (5 studies)               | ⊕⊕⊕⊖ MODERATE <sup>b</sup>               |
| Growth rate(cm/year)                                                                                                                                                                                                                                                                                                                                                                                                                                                                                                                                                                                                                                                                                                                                                                                                                                                                                                                                                                                                                                                                                                                                                                                                                                                 | 9.18(-2.14, 20.50)        | 170 (3 studies)               | ⊕⊕⊖⊖ LOW <sup>b,c</sup>                  |
| PAH(cm)                                                                                                                                                                                                                                                                                                                                                                                                                                                                                                                                                                                                                                                                                                                                                                                                                                                                                                                                                                                                                                                                                                                                                                                                                                                              | 0.69(0.43, 0.94)          | 252 (3 studies)               | ⊕⊕⊖⊖ LOW <sup>b,c</sup>                  |
| <p>GRADE working group grades of evidence.</p> <p>High quality: We are very confident that the true effect lies close to that of the estimate of the effect.</p> <p>Moderate quality: We are moderately confident in the effect estimate: The true effect is likely to be close to the estimate of the effect, but there is a possibility that it is substantially different.</p> <p>Low quality: Our confidence in the effect estimate is limited: The true effect may be substantially different from the estimate of the effect.</p> <p>Very low quality: We have very little confidence in the effect estimate: The true effect is likely to be substantially different from the estimate of effect.</p> <p>Abbreviations: SMD, standard mean deviation; CI, confidence interval; LH: Luteinizing hormone; FSH: Follicle stimulating hormone; PAH: predicted adult height</p> <p><sup>a</sup> Results for sex hormones and growth parameters in subjects with precocious puberty (GnRHa + vitamin D vs GnRHa).</p> <p><sup>b</sup> Downgraded by one level due to the quality of original studies, and potential bias risk may exist.</p> <p><sup>c</sup> Downgraded by one level due to limited numbers of original studies, and results may be inaccurate.</p> |                           |                               |                                          |
