# Supplementary material for: Does vitamin D have a potential role in precocious puberty? A meta-analysis
Source: Royal Society of Chemistry journal article supplement (doi:10.1039/d3fo00665d), 2023-01-01
Supplement: d3fo00665d6.pdf [file d3fo00665d6.pdf]

Table S4. Publication bias (Egger test) and sensitivity analysis (trim and fill method) of included studies for evaluating the role of vitamin D supplementation in patients with precocious puberty.

|             | Egger test ( <i>t</i> , <i>P</i> ) | Number of trim and fill | SMD(95%CI) <sup>a</sup> | SMD(95%CI) <sup>b</sup> |
|-------------|------------------------------------|-------------------------|-------------------------|-------------------------|
| LH          | -3.90, 0.011                       | 2                       | -3.55(-5.11, -1.99)     | -5.60(-8.77, -2.44)     |
| FSH         | -4.91, 0.003                       | 1                       | -4.35(-5.79, -2.92)     | -6.30(-8.88, -3.72)     |
| Estradiol   | -3.04, 0.023                       | 0                       | -1.21(-1.71, -0.71)     | -1.21(-1.71, -0.71)     |
| Bone age    | -7.59, 0.005                       | 0                       | -3.21(-4.86, -1.56)     | -3.21(-4.86, -1.56)     |
| Growth rate | 4.74, 0.132                        | -                       | 9.18(-2.14, 20.50)      | -                       |
| PAH         | -0.42, 0.748                       | -                       | 0.69(0.43, 0.94)        | -                       |

LH: Luteinizing hormone; FSH: Follicle stimulating hormone; PAH: predicted adult height

<sup>a</sup>:Original variation; <sup>b</sup>:Variation after trim and fill.
