# Supplementary figures and images for: Does vitamin D have a potential role in precocious puberty? A meta-analysis
Source: Royal Society of Chemistry journal article supplement (doi:10.1039/d3fo00665d), 2023-01-01

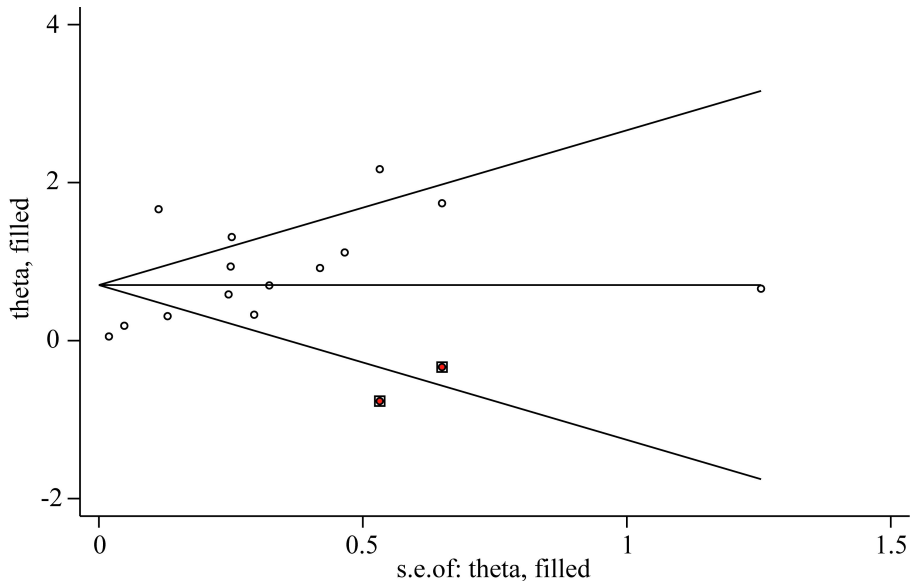

Figure S2. Funnel plot of included studies for the risk of precocious puberty (after trim and fill).

Supplement: d3fo00665d2.pdf [file d3fo00665d2.pdf]
